# Supplementary material for: Visual exploration dynamics are low-dimensional and driven by intrinsic factors
Source: PubMed Central journal article supplement (PMC8448835; doi:10.1038/s42003-021-02608-x), 2021-09-17
Supplement: 42003_2021_2608_MOESM1_ESM.pdf [file 42003_2021_2608_MOESM1_ESM.pdf]

**Supplementary Information**

**Visual exploration dynamics are low-dimensional and driven by intrinsic factors**

Andrea Zangrossi, Giorgia Cona, Miriam Celli, Marco Zorzi, and Maurizio Corbetta

## Supplementary Figures

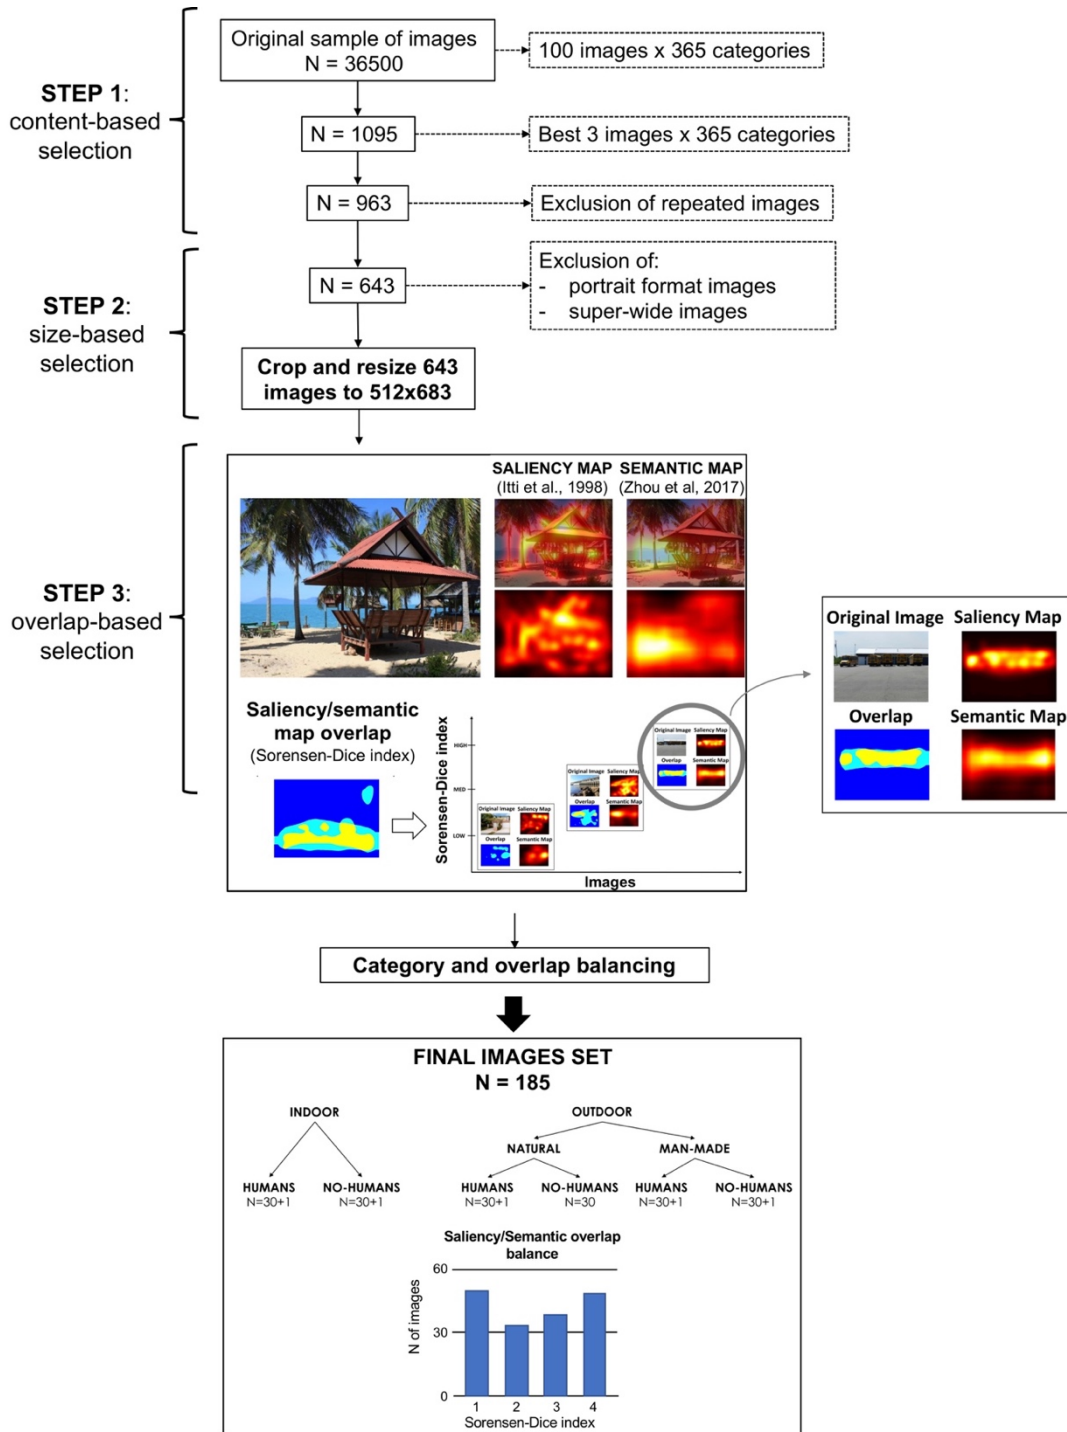

**Supplementary Figure 1. Images' selection flowchart.** The pipeline describes the procedure used to select the final sample of 185 images from the original set of 36500.

# IMAGE CATEGORIES

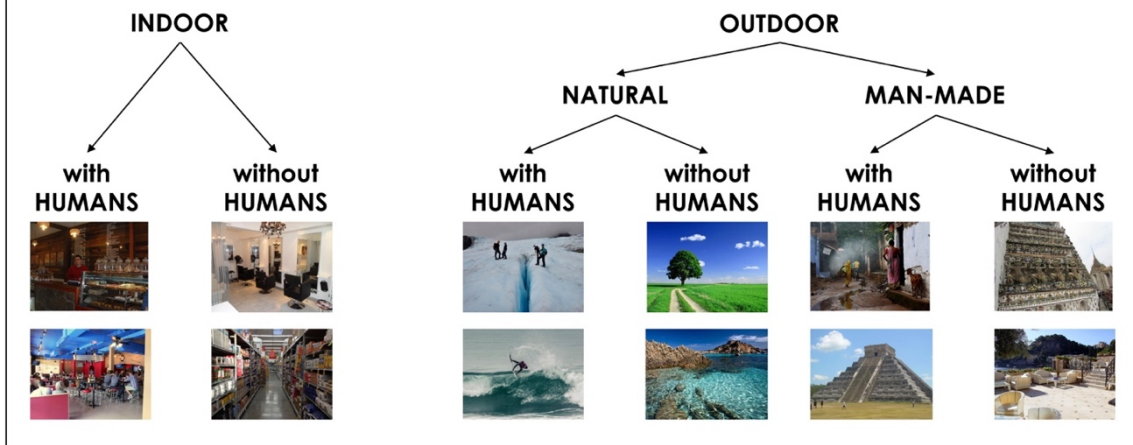

**Supplementary Figure 2. Examples of images from each category.** Each category was composed of 30 images (total: 180 images). Five more images were extracted to test the recall memory (not discussed in this paper).

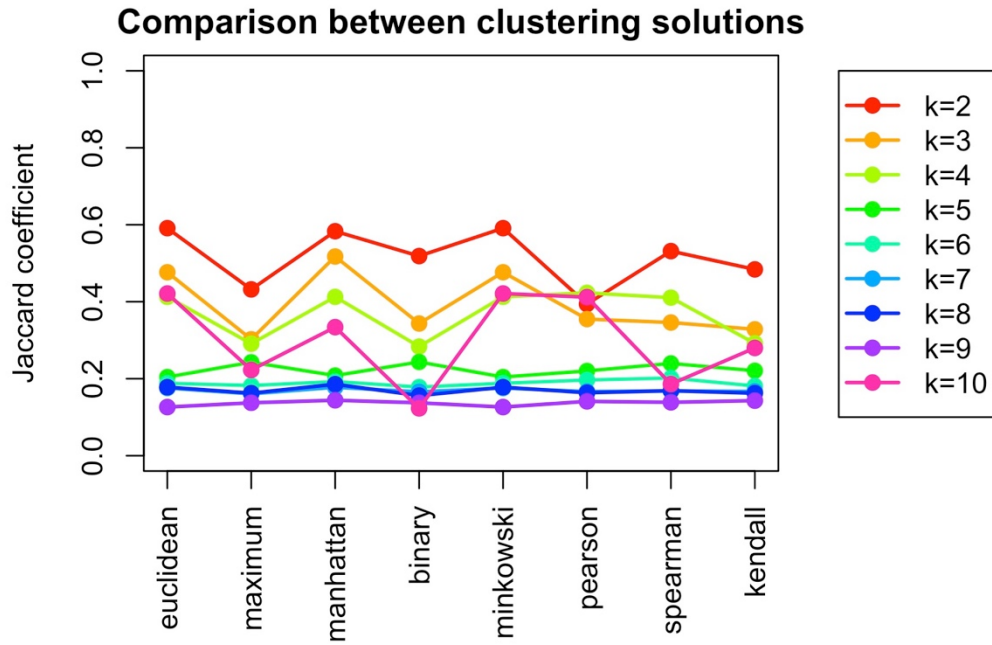

**Supplementary Figure 3. Comparison between clustering solutions.** Comparison between the clustering solution obtained using k-means and hierarchical clustering with different distance measures and different k values. The similarity is quantified by means of the Jaccard coefficient.

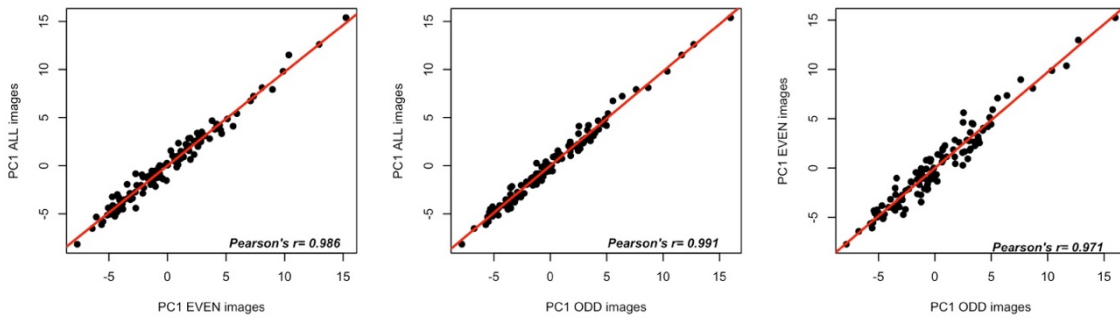

**Supplementary Figure 4. Reliability of PC1 scores in different set of images.** Correlation between PC1 individual scores (N=114) obtained on even and odd images (right), even and all images (left) and odd and all images (center).

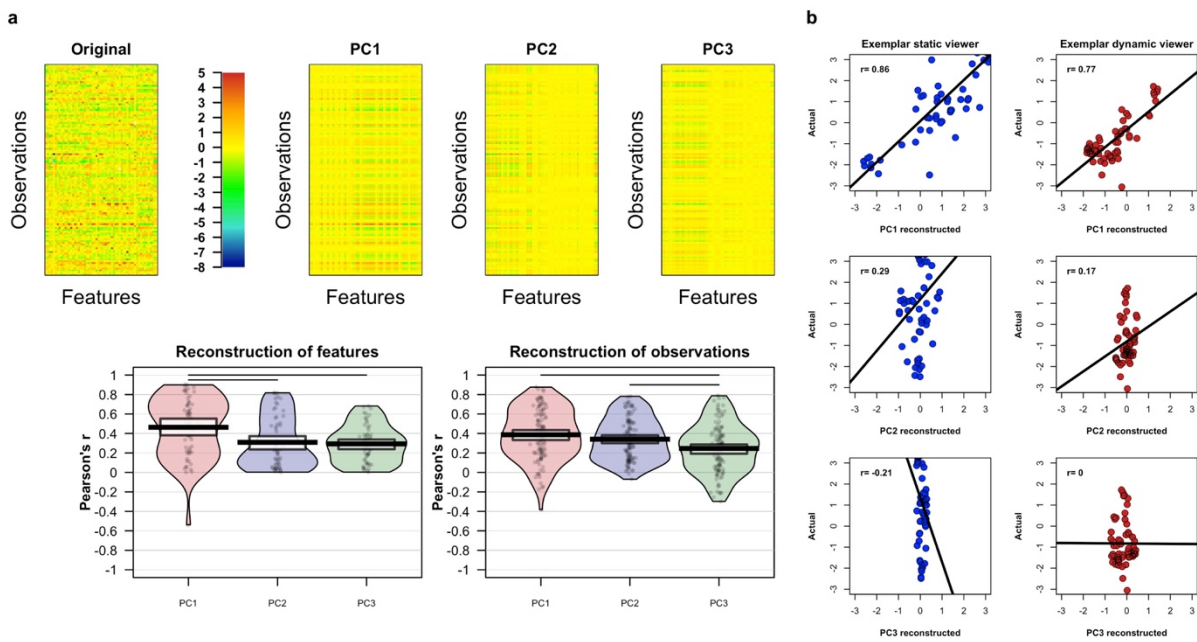

**Supplementary Figure 5. PCA-based reconstruction of features.** **a.** The original z-scored features matrix (top left) was reconstructed from PC1, PC2 and PC3, respectively, and the similarity between the original matrix and the reconstructed ones was evaluated separately for features (columns) and observations (rows) by means of Pearson's  $r$ . The violin plot shows the comparison between the distribution of Pearson's  $r$  correlation coefficients between original features/observation vectors and their reconstructions made from PC1, PC2 and PC3. The reconstruction of features based on PC1 was significantly more similar to the original features' matrix compared to both PC2- and PC3-based reconstructions. The reconstruction of observations based on PC1 was significantly better to those based on PC3, while the difference with PC2 was not significant. **b.** Reconstruction of the pattern of features of two exemplar observers (one Static and one Dynamic) from PC1 (top row), PC2 (center row) and PC3 (bottom row). The PC1-based reconstruction showed the highest similarity (Pearson's  $r$ ) with the original pattern ( $r = 0.86$  for the Static viewer and  $r = 0.77$  for the Dynamic viewer).

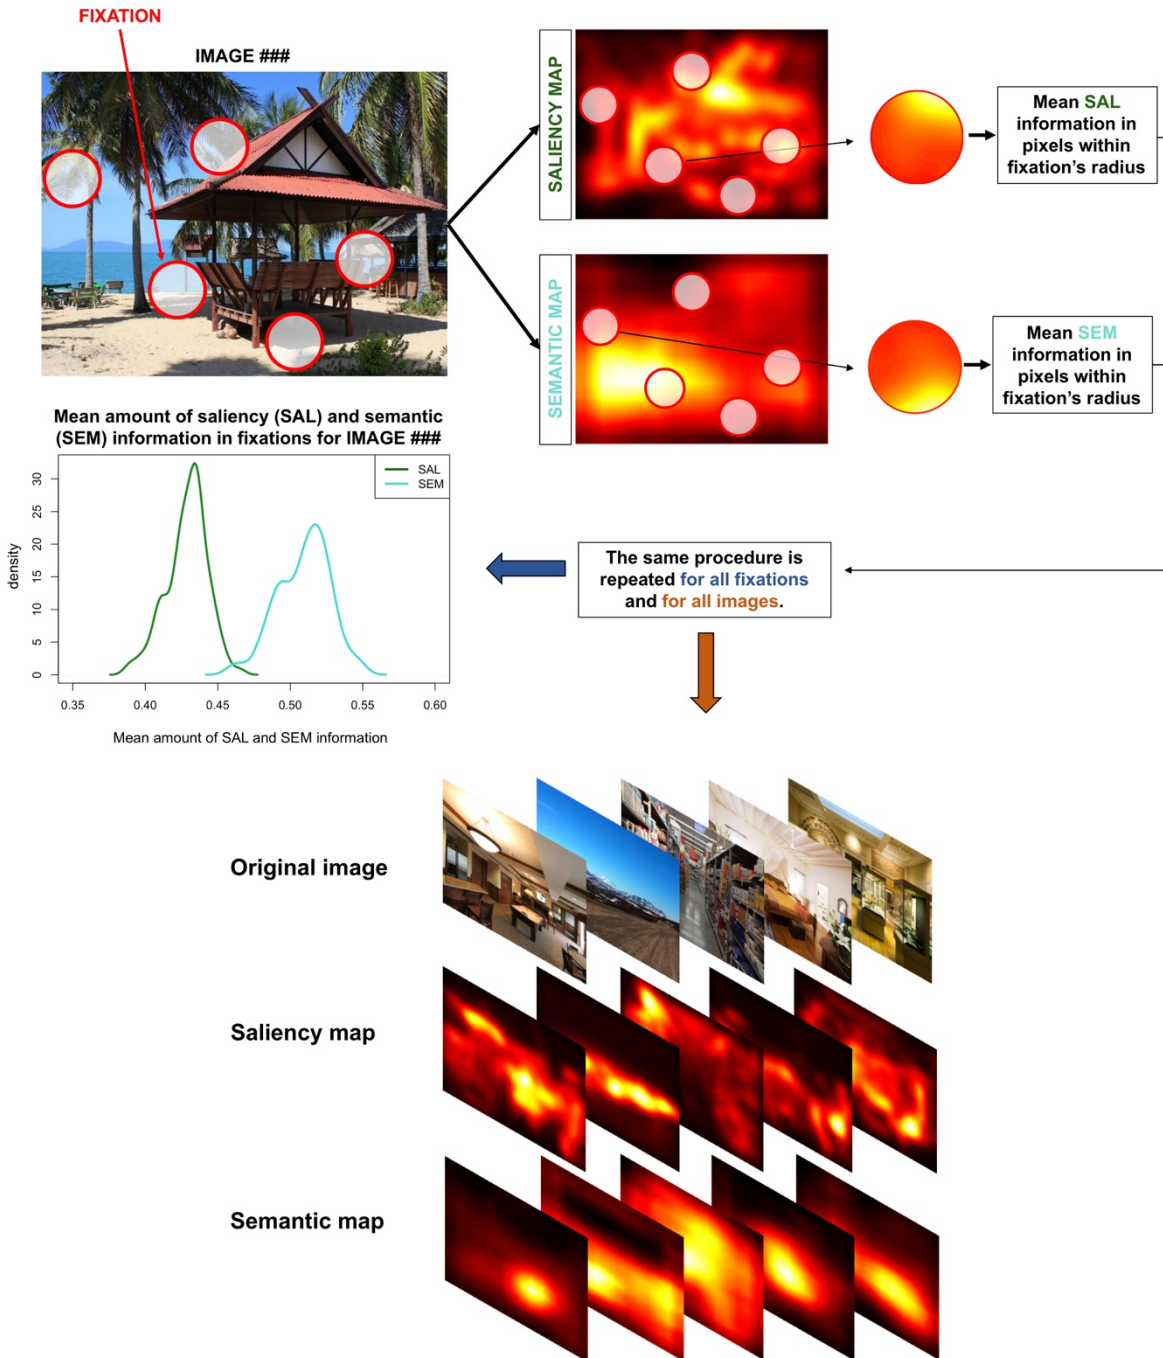

**Supplementary Figure 6. Computation of saliency (SAL) and semantic (SEM) information within fixations.** The figure represents the procedure we followed for the computation of SAL and SEM metrics, which were included in the regression models. For each fixation the saliency and semantic map values of pixels included in the fixation radius were averaged. Then, for each participant the average of all mean SAL and SEM values in his/her fixations was computed. Thus, in the regression model a single value of SAL and another of SEM was obtained for each participant. The lower part of the figure shows examples of saliency and semantic maps computed from five images.

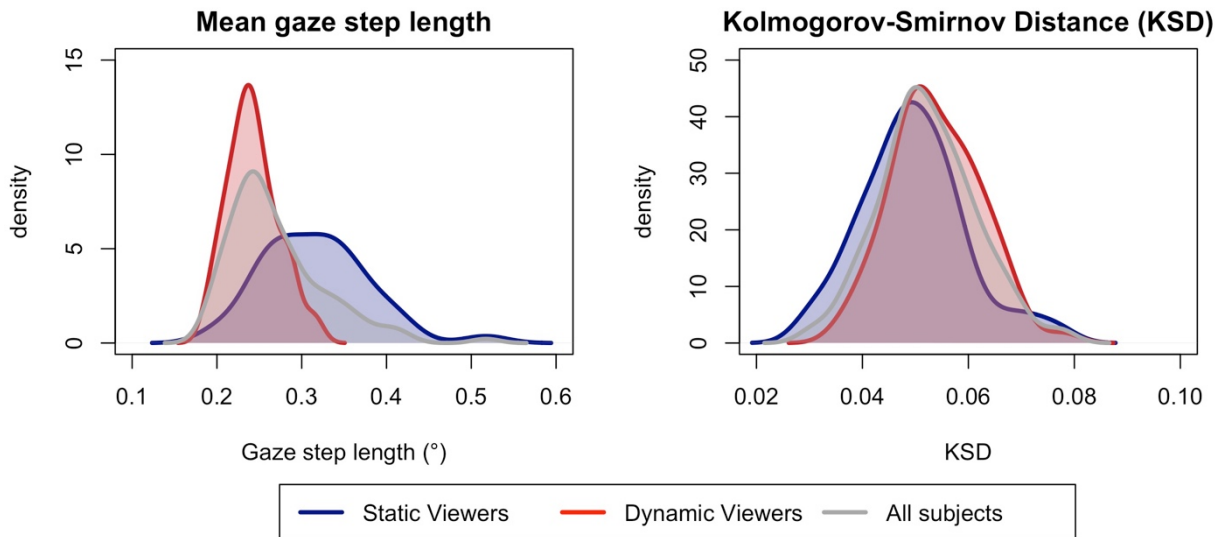

**Supplementary Figure 7. Gaze step distribution (length) and similarity to power-law.** Mean distribution of gaze step length (left plot) and of Kolmogorov-Smirnov Distance (KSD; right plot) across all subjects (grey) and within static (blue) and dynamic (red) viewers separately. Interestingly, the lowest KSD values (i.e., indicating a distribution closer to a power-law) are more frequent for static viewers than dynamic viewers, while the opposite pattern can be noticed for the upper tail. This indicates that on average Static Viewers show a more power-law-like distribution of gaze steps length than Dynamic Viewers.



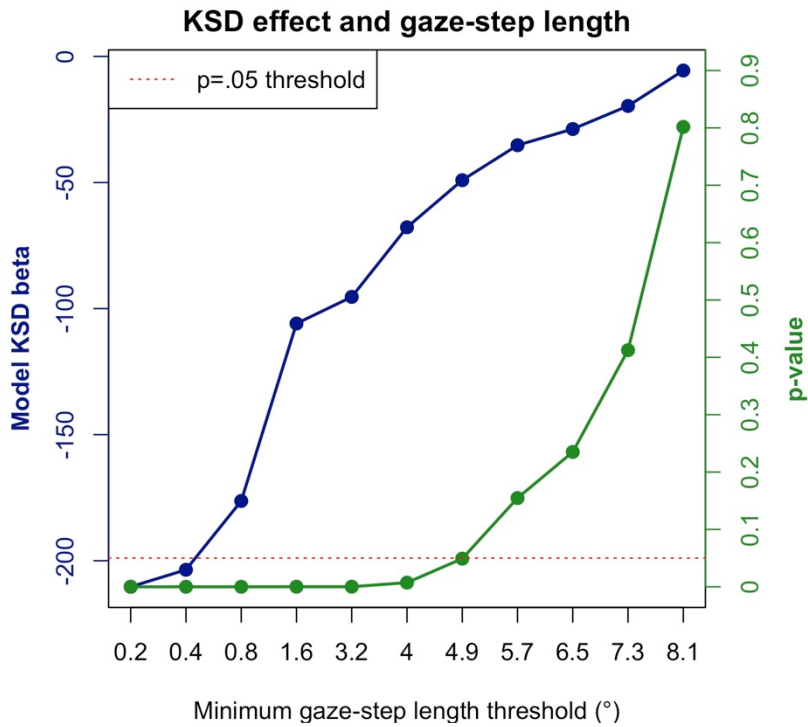

**Supplementary Figure 8. Control analysis on the reliability of the effect of KSD on PC1 across different gaze step lengths.** To test if our results were driven by eye-tracker’s spatial accuracy, we repeated our linear regression model to predict PC1 values (N=114) by iteratively computing KSD distance between gaze steps and power law distribution on different subset of trials. Specifically, we iteratively removed gaze-steps shorter than a threshold varying from 0.2° to 8.1°. The figure shows that the KSD effect on PC1 remained significant across many thresholds (0.2°-4.9°) well within the accuracy of the eye-tracker. The fact that the relationship PC1-KSD is not any longer significant after removing all gaze-steps <4.9° suggests that power-law dynamics could not explain saccades behavior, rather intrinsic dynamics might be more critical for fixational eye movements.

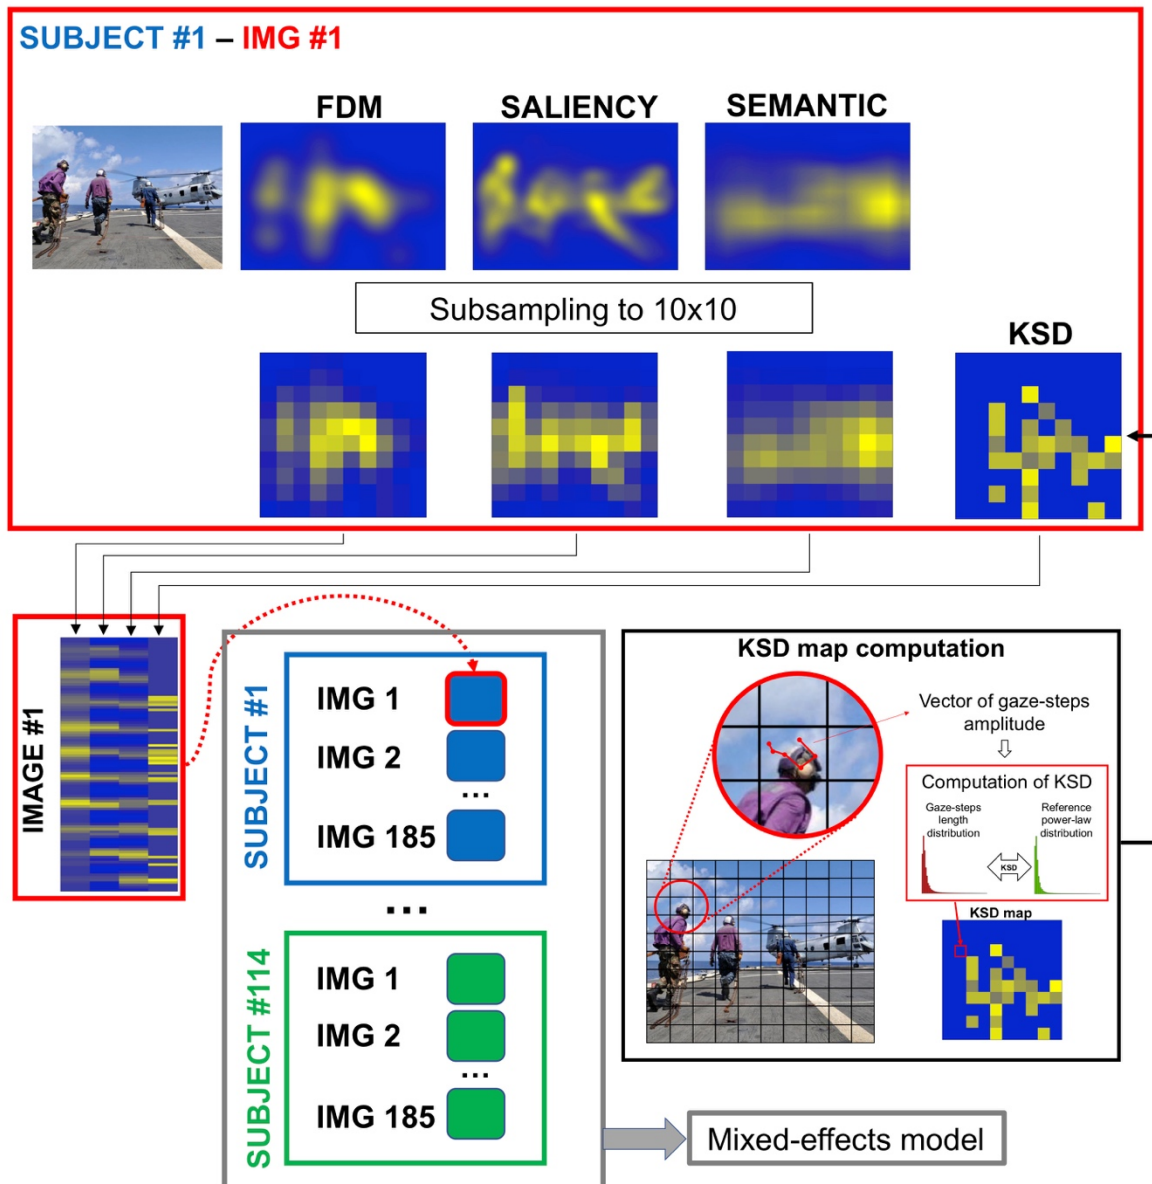

**Supplementary Figure 9. Graphical representation of the method used to build the fixation topography models.** To compute KSD maps (Black box) we first subsampled the image space (683x512 pixels) to a 10x10 matrix. Then, for each cell we extracted the vector of gaze-steps length and calculated a value of KSD indicating the distance to a power law distribution (see Methods section for details). Then (red boxes), we subsampled FDM, saliency and semantic maps to match the dimensions of the N=185 KSD map (10x10), which were then vectorized and concatenated in a dataframe (grey box) which was then used for the subsequent mixed-effect models comparison. KSD=Kolmogorov-Smirnov Distance; FDM=Fixation Density Map.

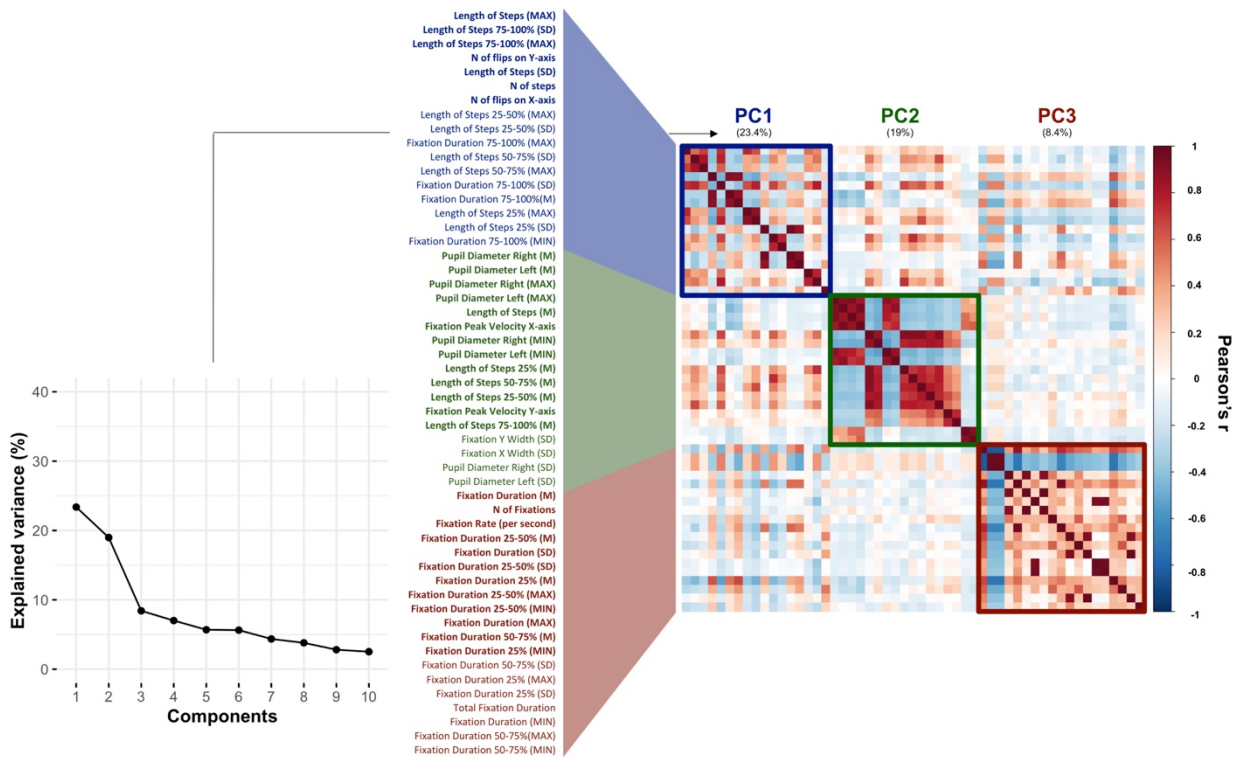

**Supplementary Figure 10. Correlation matrix of visual exploration features in blank screen viewing.** The line plot shows the variance explained by different principal components (PCs). The matrix shows the correlation (Pearson's  $r$ ) between features, which are ordered according to their loadings in the first three PCs. The color of Y axis labels indicates the PC with the highest loading for the corresponding feature, and features written in bold are those with loadings  $> 0.2$ .

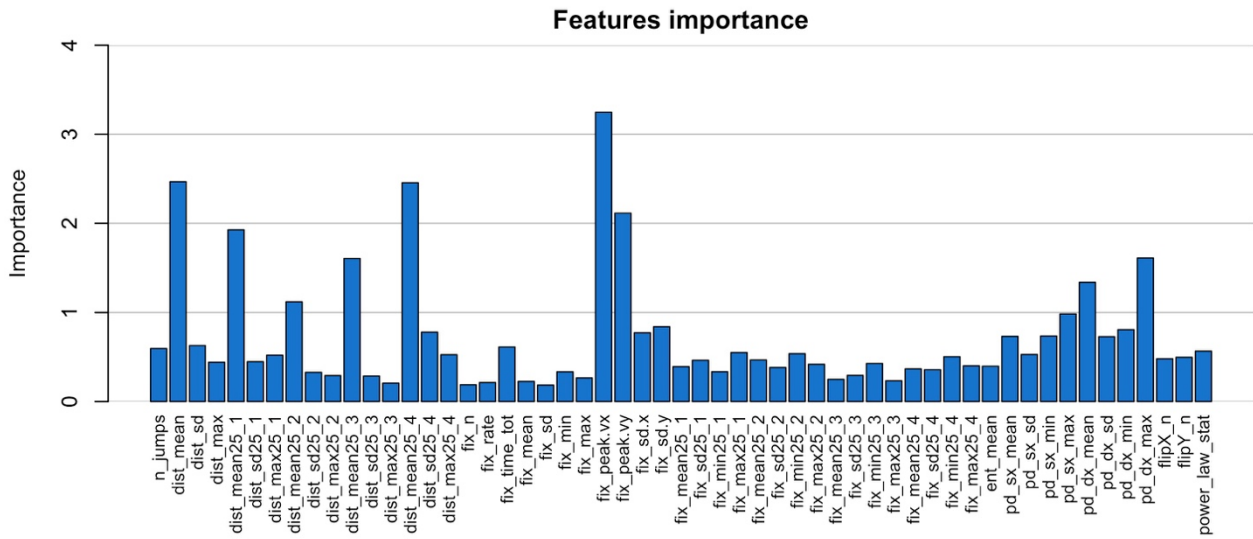

**Supplementary Figure 11. Feature importance in Random Forest model.** A description of each feature can be found in Supplementary Table 2.

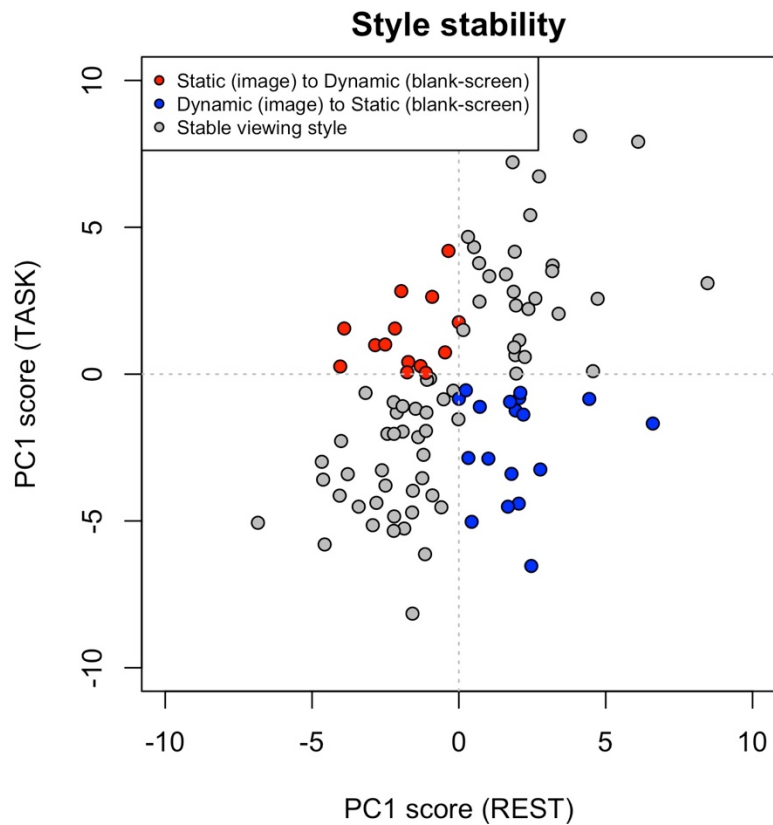

**Supplementary Figure 12. Stability of viewing style between conditions.** We checked the stability of the viewing style between image-viewing and blank screen viewing conditions. To this end, we applied PC1 loadings derived from the image-viewing condition to features computed in the blank-screen viewing condition (excluding 14 subjects for the reasons explained in the methods section). This procedure allowed us to compare PC1 scores obtained in different conditions, within the same component space. It should be noted that positive PC1 scores indicate Static viewing style, while negative values indicate Dynamic viewing style. The figure below shows the correlation between PC1 scores computed from image-viewing ('TASK') features (Y axis) and those computed from blank-screen viewing ('REST') condition (X axis). Blue dots represent Dynamic viewers who switched to Static in the blank-screen viewing (18%). Red dots depict subjects showing the opposite path (14%). Grey dots represent subjects whose viewing style was stable across conditions (68%).

## Supplementary Tables

| Category             | What is measured               | Variable                            | Sample (n=114)<br>Mean (SD) |
|----------------------|--------------------------------|-------------------------------------|-----------------------------|
| Demographic          |                                | Age                                 | 23.5 (2.45)                 |
|                      |                                | Sex                                 | 67 F                        |
|                      |                                | Years of education                  | 16.6 (1.27)                 |
| Cognitive            | Impulsivity                    | Stroop Test Words – time (s)        | 12.35 (1.94)                |
|                      |                                | Stroop Test Words – errors          | 0.04 (0.21)                 |
|                      |                                | Stroop Test Colors – time (s)       | 15.46 (2.1)                 |
|                      |                                | Stroop Test Colors – errors         | 0.52 (0.72)                 |
|                      |                                | Stroop Test Interference - errors   | 0.18 (0.75)                 |
|                      |                                | Stroop Test Interference – time (s) | 9.53 (3.64)                 |
|                      | Verbal Memory                  | Digit Span Forward                  | 6.42 (1.08)                 |
|                      |                                | Digit Span Backward                 | 4.89 (1.28)                 |
| Visuospatial ability | Rey-Osterrieth Figure - Copy   | 35.49 (1.03)                        |                             |
| Visuospatial Memory  | Rey-Osterrieth Figure – Recall | 26.38 (4.78)                        |                             |
| Personality          | Big-Five                       | NEO-FFI - Neuroticism               | 25.33 (9.14)                |
|                      |                                | NEO-FFI - Extraversion              | 28.4 (6.83)                 |
|                      |                                | NEO-FFI - Openness                  | 34.14 (6.01)                |
|                      |                                | NEO-FFI - Agreeableness             | 30.63 (5.99)                |
|                      |                                | NEO-FFI - Conscientiousness         | 29.89 (8.1)                 |
| Behavioural State    | Anxiety                        | DASS - Anxiety                      | 5.58 (4.21)                 |
|                      | Depression                     | DASS - Depression                   | 7.21 (4.86)                 |
|                      | Stress                         | DASS - Stress                       | 9.65 (4.49)                 |
| Behavioural traits   | Behavioural Impulsivity        | BIS                                 | 22.76 (4.67)                |
|                      |                                | BAS – Reward Responsiveness         | 21.04 (3.18)                |
|                      |                                | BAS - Drive                         | 12.41 (3.11)                |
|                      |                                | BAS – Fun Seeking                   | 13.03 (3.29)                |

**Supplementary Table 1. Sample demographics and behavioral measures.**

| Features                                            | Code                 | Description                                                                                                                                                            |
|-----------------------------------------------------|----------------------|------------------------------------------------------------------------------------------------------------------------------------------------------------------------|
| N of Fixations                                      | fix_n                | Number of fixations                                                                                                                                                    |
| Fixation Rate (per second)                          | fix_rate             | Number of fixations per second on average                                                                                                                              |
| Fixation Duration (M)                               | fix_mean             | Mean fixations' duration (i.e., mean interval between consecutive saccades)                                                                                            |
| Fixation Duration (SD)                              | fix_sd               | Standard deviation of fixations' duration                                                                                                                              |
| Fixation Duration (MIN)                             | fix_min              | Minimum fixation duration                                                                                                                                              |
| Fixation Duration (MAX)                             | fix_max              | Maximum fixation duration                                                                                                                                              |
| Fixation Duration 25% (M)                           | fix_mean25_1         | Mean duration of the first 25% of fixations timeseries                                                                                                                 |
| Fixation Duration 25% (SD)                          | fix_sd25_1           | Standard deviation of fixations duration in the first quarter visual exploration                                                                                       |
| Fixation Duration 25% (MIN)                         | fix_min25_1          | Minimum fixation duration in the first quarter visual exploration                                                                                                      |
| Fixation Duration 25% (MAX)                         | fix_max25_1          | Maximum fixation duration in the first quarter visual exploration                                                                                                      |
| Fixation Duration 25-50% (M)                        | fix_mean25_2         | Mean duration of the fixations from 25% to 50%                                                                                                                         |
| Fixation Duration 25-50% (SD)                       | fix_sd25_2           | Standard deviation of fixations duration in the second quarter of visual exploration                                                                                   |
| Fixation Duration 25-50% (MIN)                      | fix_min25_2          | Minimum fixation duration in the second quarter visual exploration                                                                                                     |
| Fixation Duration 25-50% (MAX)                      | fix_max25_2          | Maximum fixation duration in the second quarter visual exploration                                                                                                     |
| Fixation Duration 50-75% (M)                        | fix_mean25_3         | Mean fixations duration in the third quarter of visual exploration                                                                                                     |
| Fixation Duration 50-75% (SD)                       | fix_sd25_3           | Standard deviation of fixations duration in the third quarter visual exploration                                                                                       |
| Fixation Duration 50-75% (MIN)                      | fix_min25_3          | Minimum fixation duration in the third quarter visual exploration                                                                                                      |
| Fixation Duration 50-75%(MAX)                       | fix_max25_3          | Maximum fixation duration in the third quarter visual exploration                                                                                                      |
| Fixation Duration 75-100%(M)                        | fix_mean25_4         | Mean fixation duration in the last quarter of the visual exploration                                                                                                   |
| Fixation Duration 75-100% (SD)                      | fix_sd25_4           | Standard deviation of fixations duration in the last quarter visual exploration                                                                                        |
| Fixation Duration 75-100% (MIN)                     | fix_min25_4          | Minimum fixation duration in the last quarter of visual exploration                                                                                                    |
| Fixation Duration 75-100% (MAX)                     | fix_max25_4          | Maximum fixation duration in the last quarter visual exploration                                                                                                       |
| Total Fixation Duration                             | fix_time_tot         | Global time spent in fixations                                                                                                                                         |
| Fixation Y Width (SD)                               | fix_sd.x             | Standard deviation of fixations width on the Y axis                                                                                                                    |
| Fixation X Width (SD)                               | fix_sd.y             | Standard deviation of fixations width on the X axis                                                                                                                    |
| Fixation Peak Velocity X-axis                       | fix_peak.vx          | Fixation peak velocity on X axis                                                                                                                                       |
| Fixation Peak Velocity Y-axis                       | fix_peak.vy          | Fixation peak velocity on Y axis                                                                                                                                       |
| Pupil Diameter Right (M)                            | pd_dx_mean           | Mean of right pupil diameter (in mm)                                                                                                                                   |
| Pupil Diameter Right (SD)                           | pd_dx_sd             | Standard deviation of right pupil diameter (in mm)                                                                                                                     |
| Pupil Diameter Right (MIN)                          | pd_dx_min            | Minimum of right pupil diameter (in mm)                                                                                                                                |
| Pupil Diameter Right (MAX)                          | pd_dx_max            | Maximum of right pupil diameter (in mm)                                                                                                                                |
| Pupil Diameter Left (M)                             | pd_sx_mean           | Mean of left pupil diameter (in mm)                                                                                                                                    |
| Pupil Diameter Left (SD)                            | pd_sx_sd             | Standard deviation of left pupil diameter (in mm)                                                                                                                      |
| Pupil Diameter Left (MIN)                           | pd_sx_min            | Minimum of left pupil diameter (in mm)                                                                                                                                 |
| Pupil Diameter Left (MAX)                           | pd_sx_max            | Maximum of left pupil diameter (in mm)                                                                                                                                 |
| Exploration Time (TOT)                              | time_exp_tot         | Total exploration time                                                                                                                                                 |
| Exploration Time (M)                                | time_exp_mean        | Mean image exploration time                                                                                                                                            |
| Exploration Time (SD)                               | time_exp_sd          | Standard deviation of images exploration time                                                                                                                          |
| Exploration Time (MIN)                              | time_exp_min         | Minimum image exploration time                                                                                                                                         |
| Exploration Time (MAX)                              | time_exp_max         | Maximum image exploration time                                                                                                                                         |
| N of flips on Y-axis                                | flipX_n              | Number of flips (i.e., change of direction) on Y-axis                                                                                                                  |
| N of flips on X-axis                                | flipY_n              | Number of flips (i.e., change of direction) on X-axis                                                                                                                  |
| N of steps                                          | n_jumps              | Number of gaze steps                                                                                                                                                   |
| Length of Steps (M)                                 | dist_mean            | Mean of gaze steps length                                                                                                                                              |
| Length of Steps (SD)                                | dist_sd              | Standard deviation of the gaze steps length                                                                                                                            |
| Length of Steps (MAX)                               | dist_max             | Maximum gaze steps length                                                                                                                                              |
| Length of Steps 25% (M)                             | dist_mean25_1        | Mean of the gaze steps length in the first quarter visual exploration                                                                                                  |
| Length of Steps 25% (SD)                            | dist_sd25_1          | Standard deviation of gaze steps length in the first quarter visual exploration                                                                                        |
| Length of Steps 25% (MAX)                           | dist_max25_1         | Maximum gaze steps length in the first quarter visual exploration                                                                                                      |
| Length of Steps 25-50% (M)                          | dist_mean25_2        | Mean of the gaze steps length in the second quarter visual exploration                                                                                                 |
| Length of Steps 25-50% (SD)                         | dist_sd25_2          | Standard deviation of gaze steps length in the second quarter visual exploration                                                                                       |
| Length of Steps 25-50% (MAX)                        | dist_max25_2         | Maximum gaze steps length in the second quarter visual exploration                                                                                                     |
| Length of Steps 50-75% (M)                          | dist_mean25_3        | Mean of the gaze steps length in the third quarter visual exploration                                                                                                  |
| Length of Steps 50-75% (SD)                         | dist_sd25_3          | Standard deviation of gaze steps length in the third quarter visual exploration                                                                                        |
| Length of Steps 50-75% (MAX)                        | dist_max25_3         | Maximum gaze steps length in the third quarter visual exploration                                                                                                      |
| Length of Steps 75-100% (M)                         | dist_mean25_4        | Maximum gaze steps length in the last quarter visual exploration                                                                                                       |
| Length of Steps 75-100% (SD)                        | dist_sd25_4          | Standard deviation of gaze steps length in the last quarter visual exploration                                                                                         |
| Length of Steps 75-100% (MAX)                       | dist_max25_4         | Maximum gaze steps length in the last quarter of visual exploration                                                                                                    |
| <b>Features used in the linear regression model</b> |                      |                                                                                                                                                                        |
| Saliency info in fixations (M)                      | fix_SAL_mean (SAL)   | Mean quantity of saliency information collected in fixations                                                                                                           |
| Semantic info in fixations (M)                      | fix_SEM_mean (SEM)   | Mean quantity of semantic information collected in fixations                                                                                                           |
| Entropy of visual exploration (M)                   | ent_mean (ShEn)      | Mean Shannon entropy value calculated on the visual exploration pattern                                                                                                |
| Power law similarity of gaze                        | power_law_stat (KSD) | Distance between empirical gaze steps distribution and a reference power law computed by means of the Kolmogorov-Smirnov test (i.e., Kolmogorov-Smirnov Distance, KSD) |

**Supplementary Table 2. Description of the eye movements features extracted.**

| Features                        | Image-viewing |              |               | Blank screen viewing |               |               |
|---------------------------------|---------------|--------------|---------------|----------------------|---------------|---------------|
|                                 | PC1           | PC2          | PC3           | PC1                  | PC2           | PC3           |
| Fixation Duration 25% (M)       | <b>0.241</b>  | -0.031       | 0.068         | 0.05                 | -0.02         | <b>0.218</b>  |
| Fixation Duration (M)           | <b>0.241</b>  | -0.002       | 0.052         | -0.047               | 0.002         | <b>0.293</b>  |
| Fixation Duration 25-50% (M)    | <b>0.24</b>   | -0.003       | 0.059         | 0.103                | -0.042        | <b>0.262</b>  |
| Fixation Duration (SD)          | <b>0.232</b>  | 0.027        | 0.051         | -0.051               | -0.003        | <b>0.249</b>  |
| Fixation Duration 50-75% (M)    | <b>0.232</b>  | 0.003        | 0.057         | -0.004               | -0.003        | <b>0.211</b>  |
| Fixation Duration 25-50% (SD)   | <b>0.226</b>  | 0.004        | 0.051         | 0.103                | -0.055        | <b>0.239</b>  |
| Fixation Duration 75-100%(M)    | <b>0.216</b>  | 0.021        | 0.018         | -0.15                | 0.04          | 0.078         |
| Fixation Duration 50-75% (SD)   | <b>0.214</b>  | 0.029        | 0.044         | 0.012                | 0.007         | 0.189         |
| Fixation Duration 25% (SD)      | <b>0.213</b>  | -0.013       | 0.081         | 0.063                | -0.013        | 0.185         |
| Fixation Y Width (SD)           | 0.189         | -0.022       | -0.059        | 0.045                | 0.177         | 0.043         |
| Fixation Duration 75-100% (SD)  | 0.188         | 0.069        | 0.015         | -0.152               | 0.041         | 0.044         |
| Fixation X Width (SD)           | 0.164         | -0.02        | -0.046        | -0.012               | 0.176         | 0.014         |
| Fixation Peak Velocity Y-axis   | 0.14          | 0.016        | -0.144        | 0.102                | <b>0.228</b>  | 0.079         |
| Fixation Duration 25-50% (MAX)  | 0.127         | 0.102        | 0.044         | 0.103                | -0.054        | <b>0.217</b>  |
| Fixation Duration 25% (MAX)     | 0.108         | 0.063        | 0.063         | 0.065                | -0.012        | 0.187         |
| Fixation Duration 50-75% (MIN)  | 0.048         | 0.043        | -0.005        | -0.059               | -0.026        | 0.108         |
| Fixation Duration 25-50% (MIN)  | 0.039         | -0.012       | 0.022         | 0.008                | 0.035         | <b>0.213</b>  |
| Fixation Duration (MIN)         | 0.028         | -0.008       | -0.009        | -0.073               | 0.071         | 0.177         |
| Pupil Diameter Left (M)         | -0.184        | 0.02         | -0.003        | 0.179                | <b>-0.266</b> | 0.046         |
| Pupil Diameter Right (M)        | -0.171        | 0.032        | 0.037         | 0.155                | <b>-0.27</b>  | 0.057         |
| Pupil Diameter Left (SD)        | -0.168        | -0.005       | -0.052        | 0.032                | -0.12         | -0.052        |
| Pupil Diameter Left (MAX)       | -0.165        | 0.053        | -0.023        | 0.169                | <b>-0.257</b> | 0.021         |
| Pupil Diameter Right (SD)       | -0.155        | 0.002        | -0.005        | 0.028                | -0.135        | -0.047        |
| Pupil Diameter Right (MIN)      | -0.141        | -0.012       | 0.054         | 0.111                | <b>-0.252</b> | 0.047         |
| Pupil Diameter Right (MAX)      | -0.134        | 0.045        | 0.039         | 0.154                | <b>-0.266</b> | 0.05          |
| Pupil Diameter Left (MIN)       | -0.131        | -0.033       | 0.046         | 0.14                 | <b>-0.245</b> | 0.067         |
| Exploration Time (M)            | -0.018        | <b>0.32</b>  | 0.004         |                      |               |               |
| N of flips on Y-axis            | 0.003         | <b>0.315</b> | 0.038         | <b>-0.251</b>        | 0.071         | 0.017         |
| N of flips on X-axis            | 0.005         | <b>0.314</b> | 0.036         | <b>-0.219</b>        | 0.081         | 0.068         |
| N of steps                      | 0.006         | <b>0.31</b>  | 0.044         | <b>-0.236</b>        | 0.123         | -0.022        |
| Total Fixation Duration         | 0.044         | <b>0.299</b> | 0.032         | -0.151               | 0.051         | 0.178         |
| N of Fixations                  | -0.155        | <b>0.289</b> | -0.015        | 0.044                | 0.009         | <b>-0.283</b> |
| Exploration Time (TOT)          | -0.02         | <b>0.285</b> | -0.029        |                      |               |               |
| Exploration Time (MIN)          | -0.022        | <b>0.252</b> | 0.022         |                      |               |               |
| Fixation Duration (MAX)         | 0.082         | 0.197        | 0.02          | -0.066               | 0.01          | <b>0.211</b>  |
| Fixation Duration 75-100% (MAX) | 0.064         | 0.196        | 0.014         | -0.171               | 0.062         | 0.017         |
| Fixation Rate (per second)      | -0.187        | 0.193        | -0.008        | 0.044                | 0.009         | <b>-0.283</b> |
| Fixation Duration 50-75%(MAX)   | 0.113         | 0.131        | 0.027         | 0.003                | 0.012         | 0.169         |
| Exploration Time (MAX)          | 0.01          | 0.118        | 0.081         |                      |               |               |
| Exploration Time (SD)           | 0.047         | -0.194       | -0.001        |                      |               |               |
| Fixation Duration 25% (MIN)     | 0.076         | -0.082       | 0.037         | -0.01                | 0.016         | <b>0.206</b>  |
| Length of Steps (SD)            | -0.091        | -0.042       | <b>-0.333</b> | <b>0.246</b>         | 0.109         | -0.053        |
| Length of Steps 25% (SD)        | -0.114        | -0.021       | <b>-0.313</b> | 0.141                | 0.111         | -0.063        |
| Length of Steps 50-75% (SD)     | -0.077        | -0.078       | <b>-0.305</b> | 0.159                | 0.116         | -0.074        |
| Length of Steps 25-50% (SD)     | -0.077        | -0.103       | <b>-0.303</b> | 0.19                 | 0.066         | -0.086        |
| Length of Steps 75-100% (SD)    | -0.06         | 0.077        | <b>-0.251</b> | <b>0.259</b>         | 0.07          | 0.02          |
| Length of Steps (M)             | 0.105         | -0.019       | <b>-0.233</b> | 0.133                | <b>0.254</b>  | 0.002         |
| Length of Steps 25% (M)         | 0.081         | -0.004       | <b>-0.232</b> | 0.096                | <b>0.242</b>  | -0.019        |
| Length of Steps 50-75% (M)      | 0.1           | -0.056       | <b>-0.221</b> | 0.121                | <b>0.23</b>   | 0.006         |
| Length of Steps 25-50% (M)      | 0.097         | -0.065       | <b>-0.221</b> | 0.114                | <b>0.229</b>  | -0.021        |
| Length of Steps 50-75% (MAX)    | -0.033        | 0.061        | <b>-0.221</b> | 0.155                | 0.057         | -0.018        |
| Length of Steps (MAX)           | -0.058        | 0.095        | <b>-0.217</b> | <b>0.263</b>         | 0.007         | 0.058         |
| Length of Steps 25% (MAX)       | -0.052        | 0.095        | <b>-0.216</b> | 0.148                | 0.072         | 0.05          |
| Length of Steps 25-50% (MAX)    | -0.025        | 0.027        | -0.19         | 0.195                | 0.013         | -0.024        |
| Length of Steps 75-100% (M)     | 0.107         | 0.056        | -0.189        | 0.157                | <b>0.222</b>  | 0.046         |
| Length of Steps 75-100% (MAX)   | -0.03         | 0.107        | -0.177        | <b>0.256</b>         | 0.021         | 0.092         |
| Fixation Peak Velocity X-axis   | 0.119         | -0.01        | -0.156        | 0.069                | <b>0.253</b>  | 0.058         |
| Fixation Duration 75-100% (MIN) | 0.009         | 0.001        | 0.026         | -0.086               | 0.04          | 0.075         |

**Supplementary Table 3. Principal Components Analysis loadings.** Matrix of rotated loadings obtained in the Principal Component Analysis run on the image-viewing data and on blank screen viewing data. Values in bold are those with absolute value higher than the chosen threshold= 0.2.



| Model comparison type   | Model      | R <sup>2</sup> | Predictors                    | AIC            | BIC            | F or $\chi^2$ , [df] | p-value          |
|-------------------------|------------|----------------|-------------------------------|----------------|----------------|----------------------|------------------|
| Spatiotemporal features | M1         | .083           | SAL                           | 637.7          | 645.9          | -                    | -                |
|                         | M2         | .087           | SAL + SEM                     | 638.3          | 649.2          | 1.66 [1,111]         | .2               |
|                         | M3         | .099           | SAL + SEM + ShEn              | 637.7          | 651.4          | 2.81 [1,110]         | .097             |
|                         | <b>M4</b>  | <b>.198</b>    | <b>SAL + SEM + ShEn + KSD</b> | <b>625.5</b>   | <b>641.9</b>   | <b>14.49 [1,109]</b> | <b>&lt;.001*</b> |
| Fixation topography     | MM1        | .151           | SAL                           | -87011         | -86958         | -                    | -                |
|                         | MM2        | .195           | SAL + SEM                     | -102168        | -102104        | 15158.6 [1]          | <.001*           |
|                         | <b>MM3</b> | <b>.196</b>    | <b>SAL + SEM + KSD</b>        | <b>-102847</b> | <b>-102772</b> | <b>681.1 [1]</b>     | <b>&lt;.001*</b> |

**Supplementary Table 4. Likelihood Ratio Tests (LRTs) results.** The table shows the results of two model comparisons ran by means of LRTs on two sets of models. The first set of linear regression models (M1 to M4) used saliency, semantic, Shannon entropy, and KSD to predict PC1 scores. The second set of models used saliency, semantic and KSD to predict fixation topography (image-specific Fixation Density Maps, FDMs). For each model Akaike Information Criterion (AIC), Bayesian Information Criterion (BIC), statistic value (F for linear regression,  $\chi^2$  for mixed-effects models) and p-values are reported. SAL = saliency information; SEM=semantic information; ShEn = Shannon Entropy of visual exploration topography; KSD = Kolmogorov-Smirnov Distance. \*=p-value below .05. Best models are noted in bold.

| Model type                  | Predictor                                      | Beta    | SE    | t      | p       |
|-----------------------------|------------------------------------------------|---------|-------|--------|---------|
| Spatiotemporal features     | Saliency information in fixations (SAL)        | -32.03  | 41.17 | -.78   | .44     |
|                             | Semantic information in fixations (SEM)        | -29.59  | 33.78 | -.88   | .38     |
|                             | Shannon Entropy (ShEn)                         | 1.71    | .97   | 1.76   | .08     |
|                             | <b>Kolmogorov-Smirnov Distance (KSD)</b>       | -151.78 | 40.06 | -3.79  | <.001 * |
| Fixation topography model   | <b>Saliency information in fixations (SAL)</b> | .37     | .0022 | 167.16 | <.001*  |
|                             | <b>Semantic information in fixations (SEM)</b> | .24     | .0019 | 123.32 | <.001*  |
|                             | <b>Kolmogorov-Smirnov Distance (KSD)</b>       | -.21    | .0079 | -26.11 | <.001*  |
| Cognitive-Personality model | Sex                                            | .97     | .98   | .99    | .32     |
|                             | <b>Age</b>                                     | .67     | .25   | 2.66   | .01 *   |
|                             | Education                                      | .21     | .39   | .54    | .59     |
|                             | <b>Stroop (Time)</b>                           | -.29    | .12   | -2.36  | .02 *   |
|                             | Span Forward                                   | -.70    | .43   | -1.60  | .11     |
|                             | Span Backward                                  | .30     | .34   | .90    | .37     |
|                             | Rey-Osterrieth figure – Delayed Recall         | .10     | .09   | 1.09   | .28     |
|                             | NEO-FFI - Neuroticism                          | .01     | .07   | .10    | .92     |
|                             | NEO-FFI – Extraversion                         | .03     | .09   | .29    | .77     |
|                             | NEO-FFI – Openness                             | .14     | .07   | 1.93   | .06 (*) |
|                             | NEO-FFI – Agreeableness                        | -.05    | .09   | -.63   | .53     |
|                             | NEO-FFI – Conscientiousness                    | -.01    | .07   | -.12   | .90     |
|                             | BIS                                            | -.02    | .12   | -.18   | .86     |
|                             | BAS – Reward Responsiveness                    | .09     | .15   | .63    | .53     |
|                             | BAS – Drive                                    | .12     | .20   | .57    | .57     |
| BAS – Fun Seeking           | -.09                                           | .15     | -.61  | .54    |         |

**Supplementary Table 5. Statistics for the linear regression models.** Beta, Standard Error (SE), t and p-value are reported for each predictor. The set of predictors included in the Cognitive-Personality model resulted from a stepwise procedure. \*=p-value below .05; (\*)=trend to significance (i.e., p-value between .05 and .1). Significant predictors are written in bold.
